# Supplementary material for: Two new quinoline-based regenerable fluorescent probes with AIE characteristics for selective recognition of Cu2+ in aqueous solution and test strips
Source: Royal Society of Chemistry journal article supplement (doi:10.1039/c8an00940f), 2018-01-01
Supplement: c8an00940f1.pdf [file c8an00940f1.pdf]

---

## Two new quinoline-based regenerable fluorescent probes with AIE characteristics for the selective recognition of Cu<sup>2+</sup> in aqueous solution and test strips

Jingwen Xiong<sup>a</sup>, Zongzhi Li<sup>a</sup>, Jihua Tan<sup>a</sup>, Shaomin Ji<sup>a,\*</sup>, Jianwei Sun<sup>b</sup>, Xianwei Li<sup>a</sup>, Yanping Huo<sup>a,\*</sup>

<sup>a</sup> School of Chemical Engineering and Light Industry, Guangdong University of Technology, Guangzhou 510006, China

<sup>b</sup> Department of Chemistry, The Hong Kong University of Science and Technology, Clear Water Bay, Kowloon, Hong Kong, China

\*Corresponding authors. Tel.: +86 20 39322236; Fax: +86 20 39322235; Mobile: +86 13798135622 (Y. Huo).

E-mail addresses: yphuo@gdut.edu.cn (Y. Huo), smji@gdut.edu.cn (S. Ji).

### **Materials and apparatus**

The compound 2-chloro-N-(quinolin-8-yl)acetamide (**1**) was prepared according to the literature. 8-aminoquinoline, chloroacetyl chloride, bromotriphenylethylene were obtained from Aladdin Chemistry Co., Ltd. 4-Formylphenylboronic acid and 8-hydroxyquinoline were purchased from Energy Chemical Co. Ltd. The metal ion aqueous solutions used in this work (Ag<sup>+</sup>, Al<sup>3+</sup>, Ca<sup>2+</sup>, Cd<sup>2+</sup>, Co<sup>2+</sup>, Cu<sup>2+</sup>, Fe<sup>2+</sup>, Fe<sup>3+</sup>, Hg<sup>2+</sup>, K<sup>+</sup>, Li<sup>+</sup>, Mg<sup>2+</sup>, Na<sup>+</sup>, Ni<sup>2+</sup> and Zn<sup>2+</sup>) were prepared from their chloride or nitrate salts. All the metal salts were purchased from Sinopharm Chemical Reagent Beijing Co. Ltd. Other materials were of analytical grade and used directly without further purification.

NMR spectra were conducted on Bruker AVANCE III 400 MHz and 600 MHz Superconducting Fourier in chloroform-d or DMSO-d<sub>6</sub> with tetramethylsilane as internal reference. PXRD data were collected on a DMAX2500 diffractometer using Cu Kα radiation. The calculated PXRD patterns were produced using the SHELXTL-XPOW program and single crystal reflection data. UV-vis absorption spectra were

---

obtained using the UV-vis absorption spectrometer of Ocean Optics. Fluorescence spectra were recorded with HORIBA FluoroMax-4 fluorescence spectrometer and Ocean Optics fluorescence spectrometer. All pH measurements were performed with a pHS-3C pH meter (Shanghai Precision & Scientific instrument Co., LTD., Shanghai, China). Time-resolved fluorescence spectra were measured at FLS980 (Edinburgh Instruments, England). Mass spectra (ESI) were performed on a Matrix-Assisted Laser Desorption/ Ionization Time of Flight Mass Spectrometry (MALDI-TOF-MS) and a Finnigan LCQ mass spectrometer using dichloromethanemethanol as mobile phase.

## Synthesis and characterization of probe **I** and **2**

Preparation of 2-chloro-N-(quinolin-8-yl)acetamide (**I**). Chloroacetyl chloride (2.7 mL) was dissolved in chloroform (2.5 mL). It was added dropwise to the solution of 8-aminoquinoline (1.44 g, 10 mmol) and triethylamine (1.5 mL) in chloroform (5.0 mL) within 1 h. After being stirred for 2 h at room temperature, the mixture was extracted 2 or 3 times with dichloromethane and then removed under reduced pressure to obtain a white solid. The white solid was purified by silica gel column chromatography, eluted with dichloromethane, to afford **I**. Yield: 1.38 g (62%).

<sup>1</sup>H NMR (400 MHz, chloroform-d)  $\delta$  10.92 (s, 1H), 8.88 (d,  $J$  = 4.1 Hz, 1H), 8.76 (d,  $J$  = 4.1 Hz, 1H), 8.21 (d,  $J$  = 8.3 Hz, 1H), 7.58 (d,  $J$  = 6.8 Hz, 2H), 7.50 (d,  $J$  = 12.5 Hz, 1H), 4.33 (s, 2H).

Preparation of 4-(1,2,2-triphenylvinyl)benzaldehyde (**II**). Bromotriphenylethylene (1.68 g, 5 mmol), 4-formylphenylboronic acid (0.97 g, 6.5 mmol), K<sub>2</sub>CO<sub>3</sub> (2.76 g, 20 mmol) and Pd(dppf)Cl<sub>2</sub> (0.04 g, 0.05 mmol) were mixed with CH<sub>3</sub>Ph-CH<sub>3</sub>OH (25:25, v/v). The mixture was stirred for 16 h under N<sub>2</sub> at 75°C. After that, the mixture was cooled to room temperature and extracted for 2 or 3 times with dichloromethane. The organic mixture was evaporated under reduced pressure to obtain a raw product of Compound **II**. Finally, the raw product was purified by silica gel column chromatography using ethyl acetate/n-hexane (1:10, v/v) as the eluent to

---

afford compound **II**. Yield: 1.62 g (89%).

<sup>1</sup>H NMR (400 MHz, chloroform-d)  $\delta$  9.90 (s, 1H), 7.61 (d,  $J$  = 8.0 Hz, 2H), 7.19 (d,  $J$  = 8.0 Hz, 2H), 7.16 - 7.07 (m, 9H), 7.07 - 6.96 (m, 6H).

Preparation of (*E*)-2-(4-(1,2,2-triphenylvinyl)styryl)quinolin-8-yl acetate (**III**).

Compound **II** (1.08 g, 3 mmol) and 8-hydroxyquinaldine (0.72 g, 4.5 mmol) were added to acetic anhydride (5 mL). Under N<sub>2</sub>, the mixture was stirred for 40 h at 140°C. Precipitation occurred during the reaction progress. At the end of reaction, the mixture was cooled to room temperature and then washed it three times with water. Eventually, compound **III** was obtained after vacuum drying. Yield: 1.17 g (72%).

Preparation of (*E*)-2-(4-(1,2,2-triphenylvinyl)styryl)quinolin-8-ol (**IV**).

Compound **III** (1.08 g, 2 mmol) was added to pyridine (10 mL). After being stirred for 30 min under N<sub>2</sub> at 135°C, H<sub>2</sub>O (5 mL) was added to the mixture, which was kept stirring for 5 h under the same condition. At the end of reaction, the mixture was added to H<sub>2</sub>O (50 mL) to obtain a solid. The solid was washed three times with water (100mL). Eventually, the raw product was purified by silica gel column chromatography using ethyl acetate/n-hexane (1:30, v/v) as the eluent to afford compound **IV**. Yield: 0.70 g (70%).

<sup>1</sup>H NMR (400 MHz, DMSO-d<sub>6</sub>)  $\delta$  9.51 (s, 1H), 8.26 (d,  $J$  = 8.6 Hz, 1H), 8.00 (d,  $J$  = 16.2 Hz, 1H), 7.73 (d,  $J$  = 8.6 Hz, 1H), 7.47 (d,  $J$  = 8.1 Hz, 2H), 7.43 - 7.30 (m, 3H), 7.24 - 7.06 (m, 10H), 7.00 (dd,  $J$  = 15.2, 7.2 Hz, 8H).

Preparation of (*E*)-2-(2-(anthracen-9-yl)vinyl)quinolin-8-ol (**V**). 9-Anthracenecarboxaldehyde (1.03 g, 5 mmol) and 8-hydroxyquinaldine (0.96 g, 6 mmol) were added to acetic anhydride (5 mL). The mixture was stirred for 40 h at 140°C. At the end of reaction, the mixture was cooled to room temperature and washed with water, and dried in vacuo to give brown viscous solid. After then, the brown viscous solid obtained in the previous step was added to pyridine (20 mL). After being stirred for 30 min at 130°C, H<sub>2</sub>O (10 mL) was added to the mixture, and

then it was stirred for 8 h under the same condition. After the end of reaction, the mixture was added to H<sub>2</sub>O (50 mL) to give a solid. The solid was washed three times with water (100 mL). Eventually, to purify the raw product by silica gel column chromatography using dichloromethane / petroleum ether (1:9, v/v) as the eluent to afford compound **VII**. Yield: 1.25 g (72%).

<sup>1</sup>H NMR (400 MHz, DMSO)  $\delta$  9.78 (s, 1H), 9.09 (d,  $J$  = 16.4 Hz, 1H), 8.63 (s, 1H), 8.52- 8.44 (m, 2H), 8.39 (d,  $J$  = 8.5 Hz, 1H), 8.18 - 8.12 (m, 2H), 7.99 (d,  $J$  = 8.5 Hz, 1H), 7.63 - 7.53 (m, 4H), 7.49 - 7.39 (m, 2H), 7.27 (d,  $J$  = 16.4 Hz, 1H), 7.14 (dt,  $J$  = 9.8, 4.9 Hz, 1H).

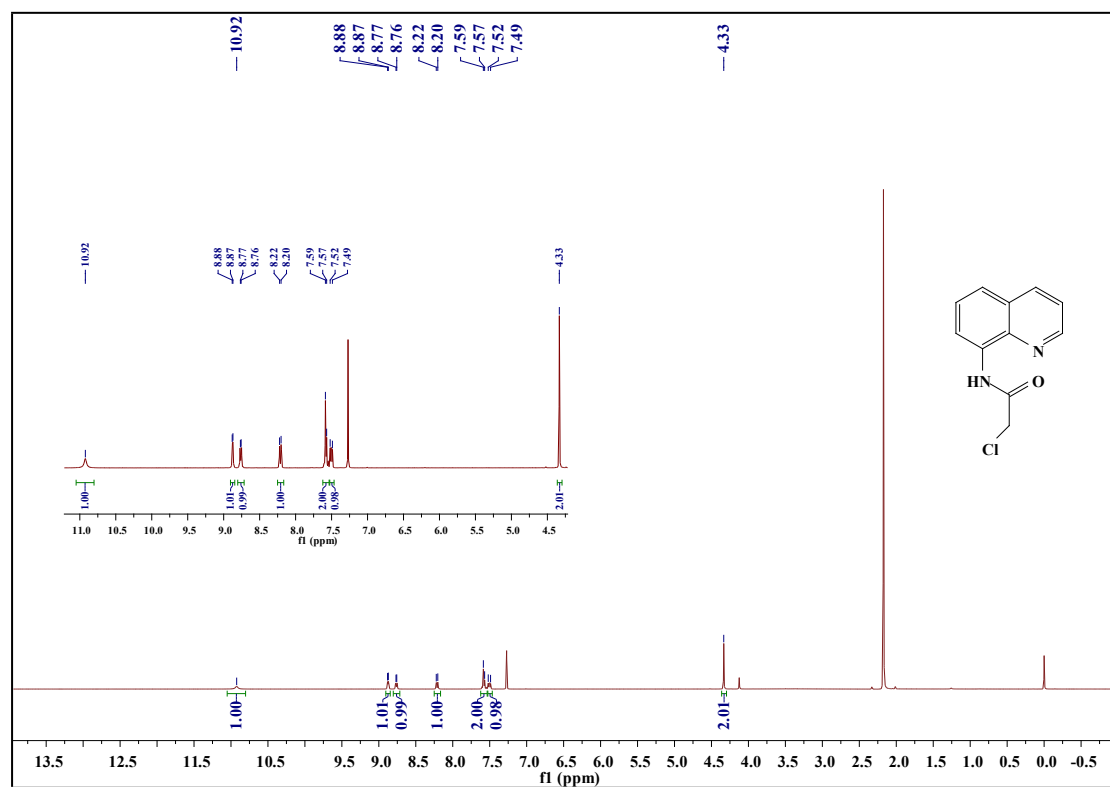

**Fig.S1.** <sup>1</sup>H NMR spectrum of 2-chloro-N-(quinolin-8-yl)acetamide (Chloroform-d)

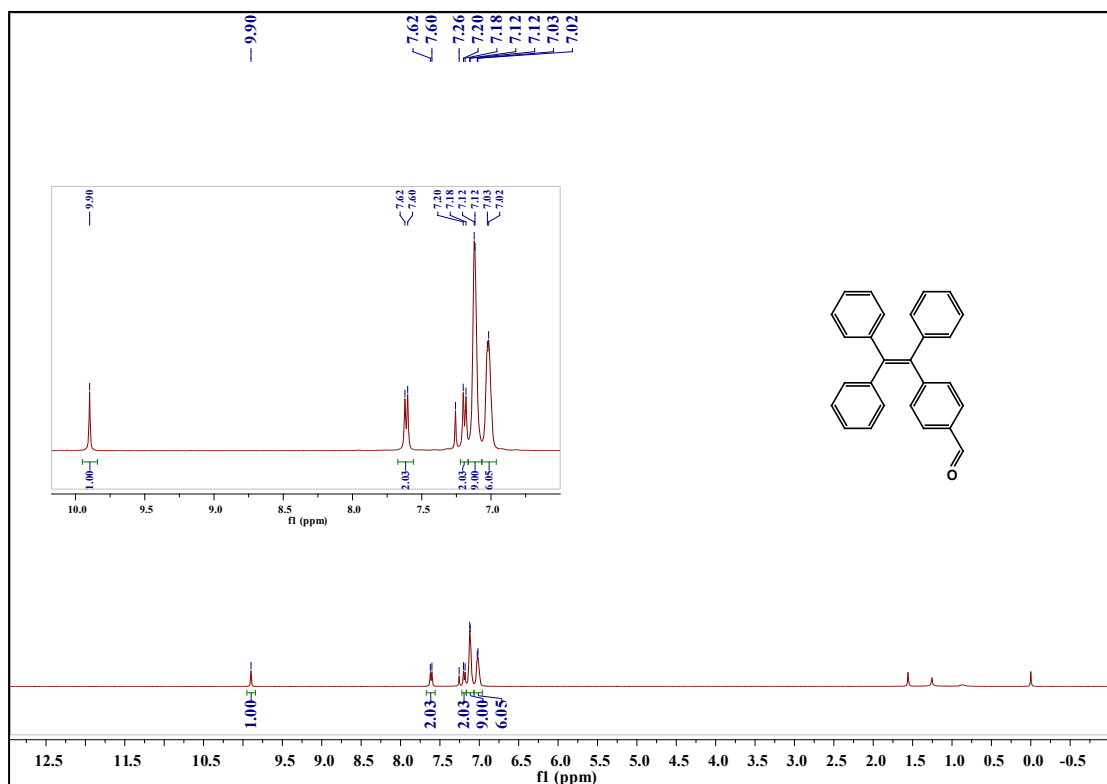

**Fig.S2.**  $^1\text{H}$  NMR spectrum of 4-(1,2,2-triphenylvinyl)benzaldehyde ( $\text{CDCl}_3$ )

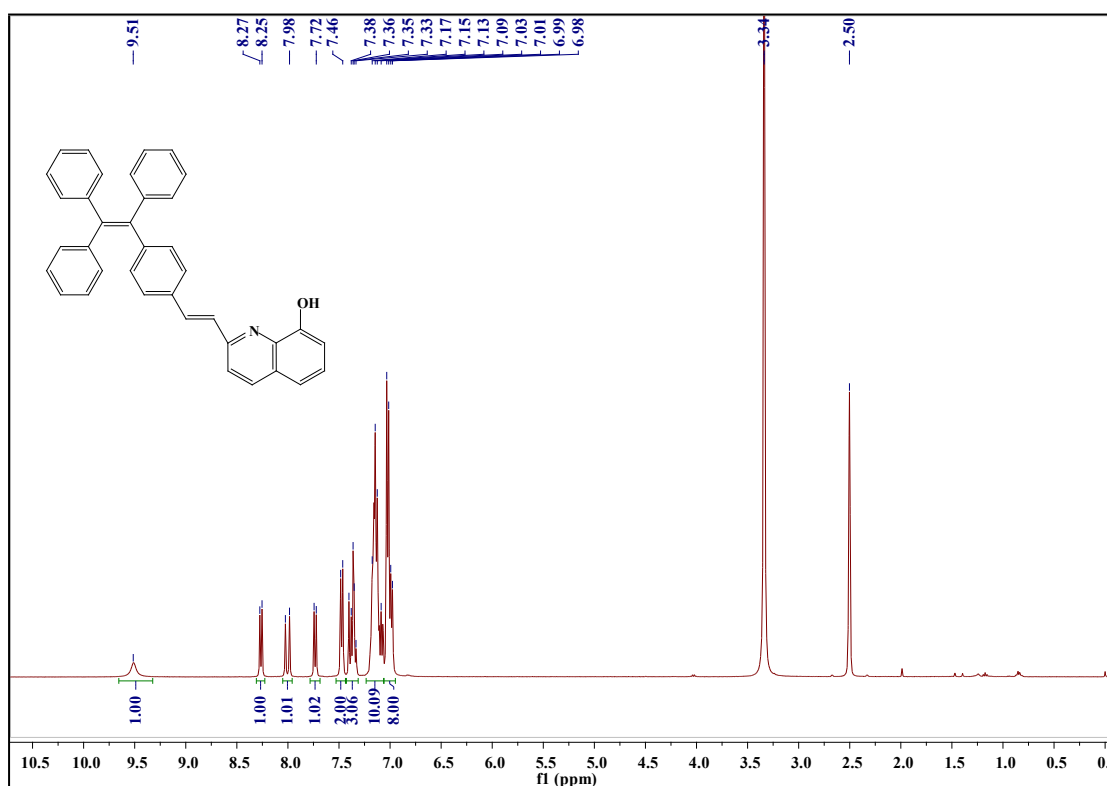

**Fig.S3.**  $^1\text{H}$  NMR spectrum of (E)-2-(4-(1,2,2-triphenylvinyl)styryl)quinolin-8-ol ( $\text{DMSO-d}_6$ )

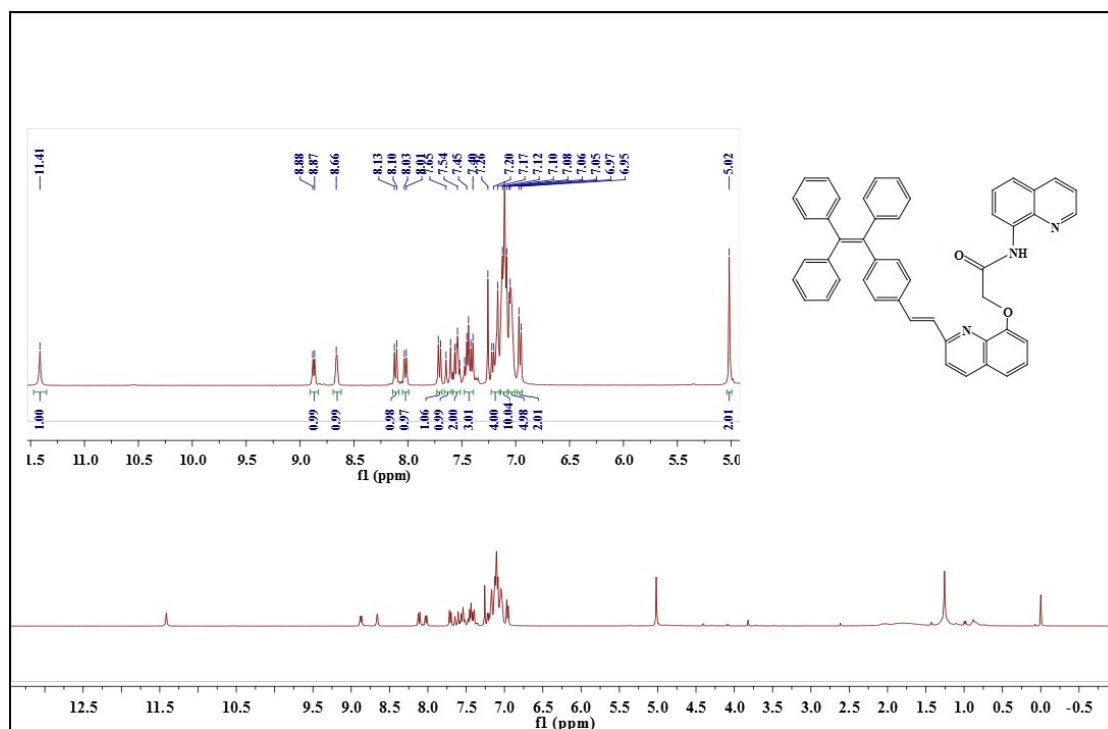

**Fig.S4.** <sup>1</sup>H NMR spectrum of probe *1* (Chloroform-d)

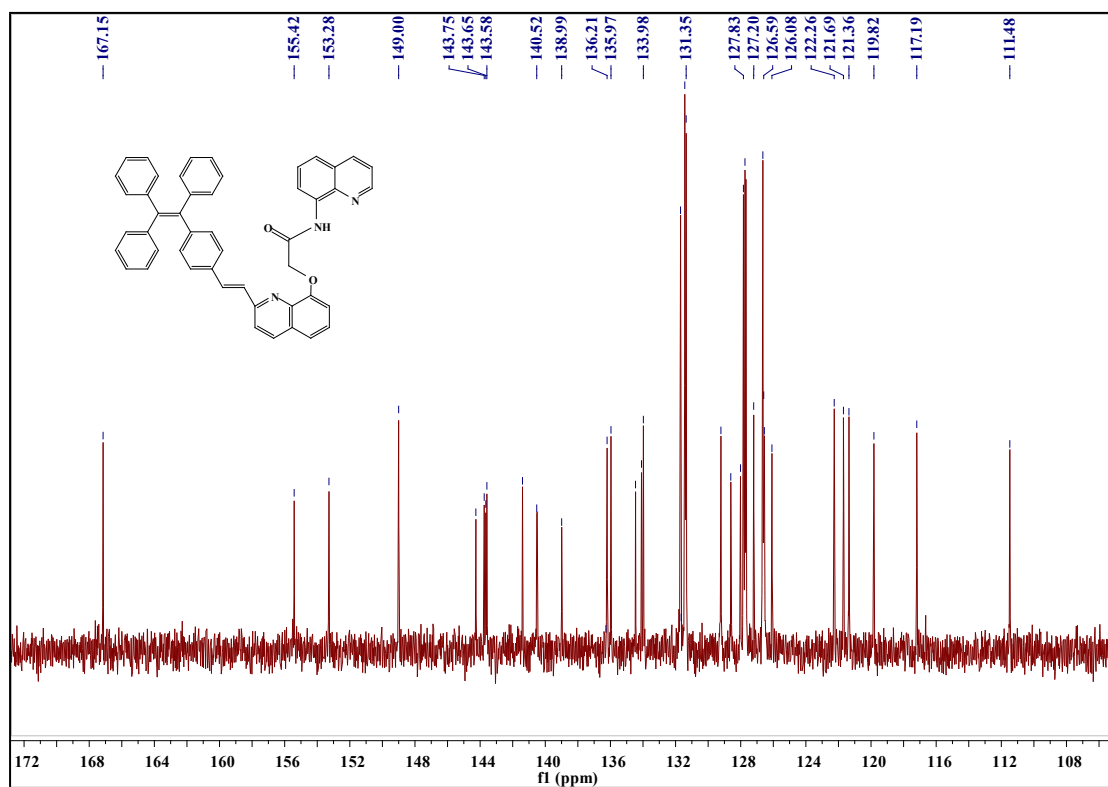

**Fig.S5.** <sup>13</sup>C NMR spectrum of probe *1* (Chloroform-d)

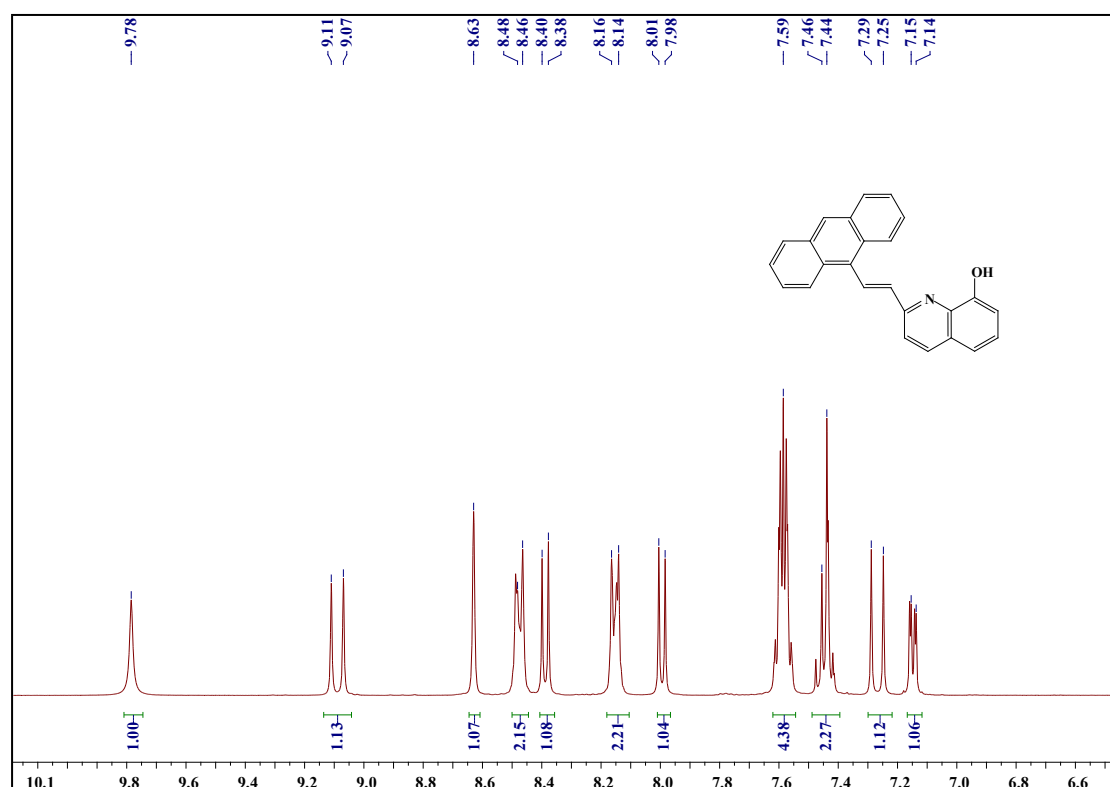

**Fig.S6.**  $^1\text{H}$  NMR spectrum of (E)-2-(2-(anthracen-9-yl)vinyl)quinolin-8-ol (**VII**) (DMSO- $\text{d}_6$ )

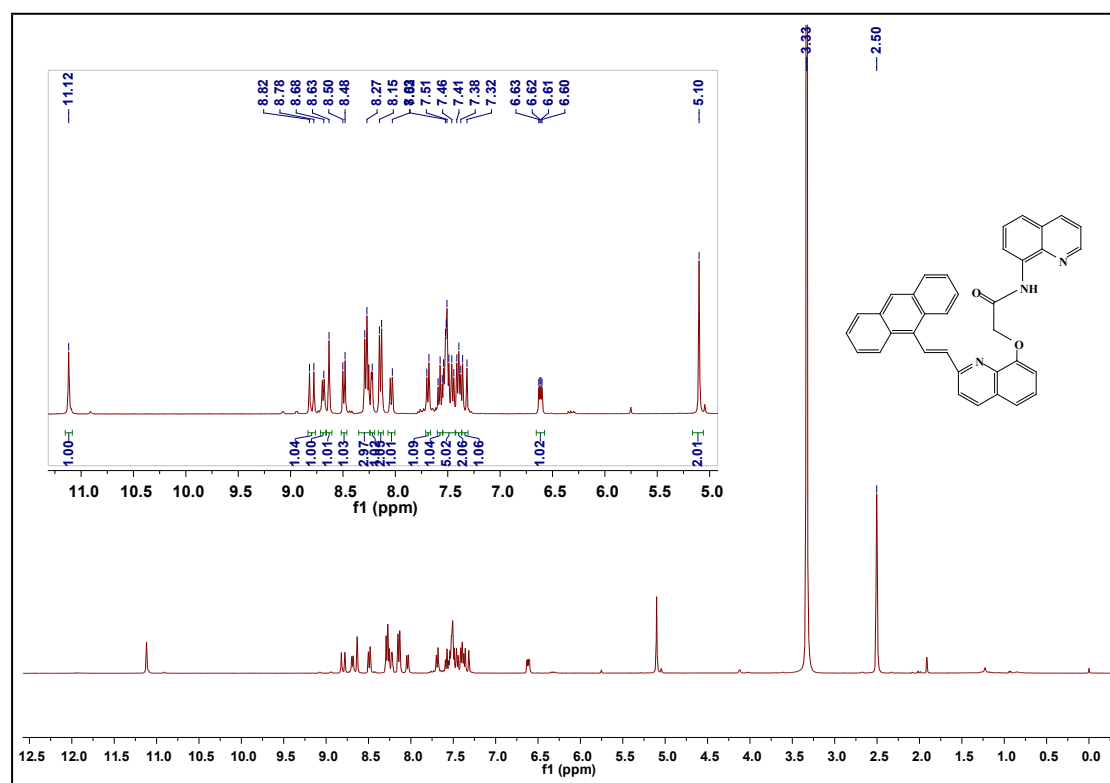

**Fig.S7.**  $^1\text{H}$  NMR spectrum of probe **2** (DMSO- $\text{d}_6$ )

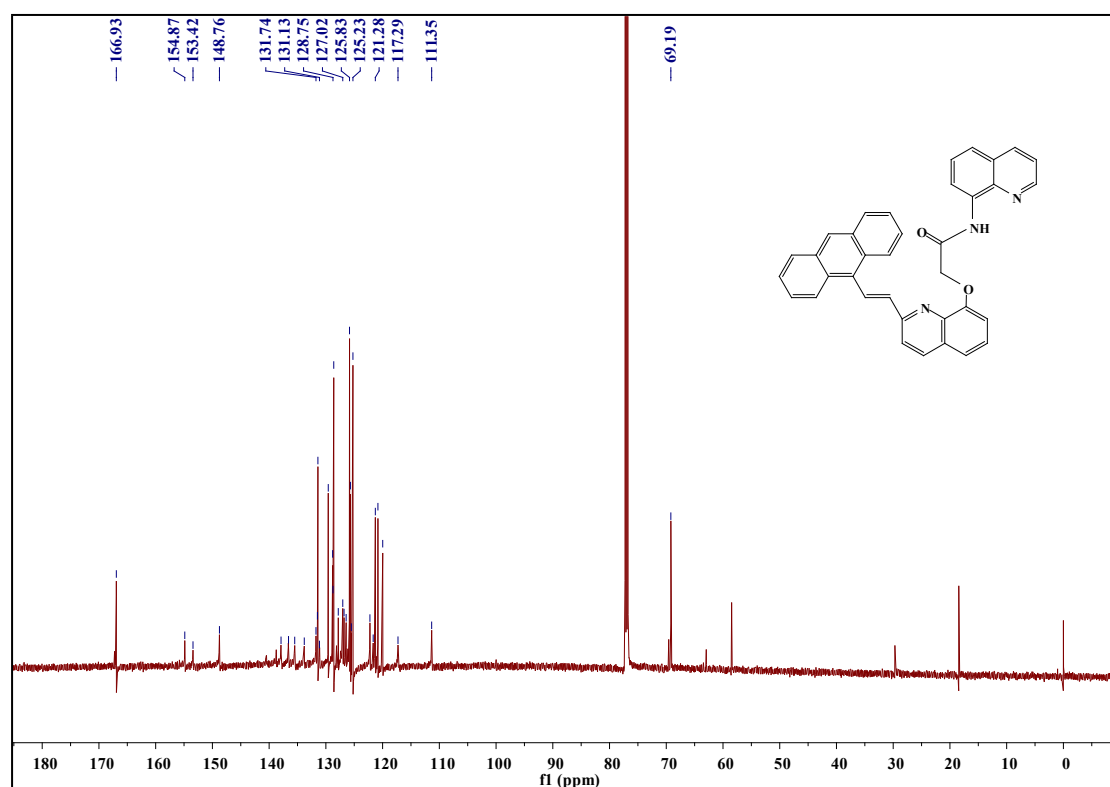

**Fig.S8.**  $^{13}\text{C}$  NMR spectrum of probe **2** (Chloroform-d)

A)

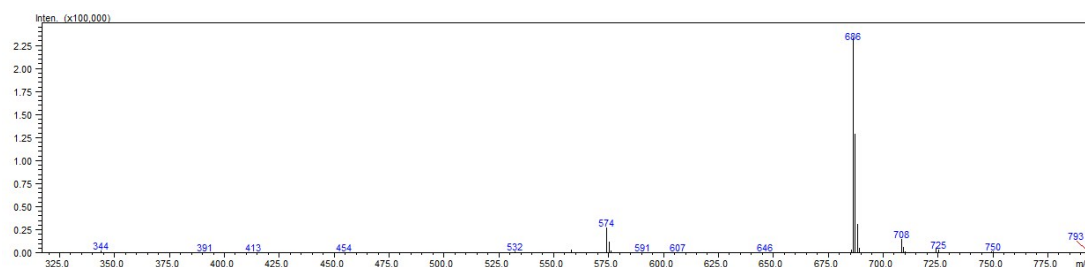

B)

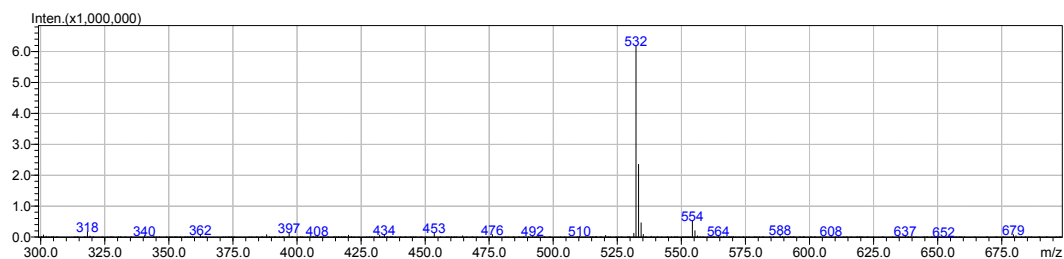

**Fig.S9.** (A) The MS spectrum of probe **1** in  $\text{CH}_3\text{OH}$ . (B) The MS spectrum of probe **2** in  $\text{CH}_3\text{OH}$ .



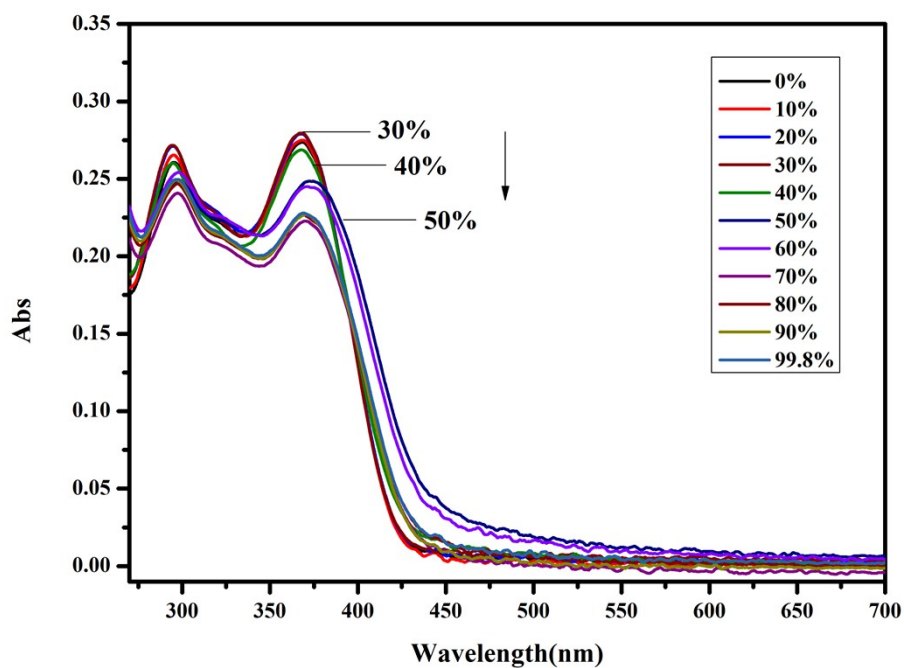

**Fig.S10.** UV-vis absorption spectra of **1** in different ratios of DMSO/H<sub>2</sub>O.

Concentration: 10  $\mu$ M.

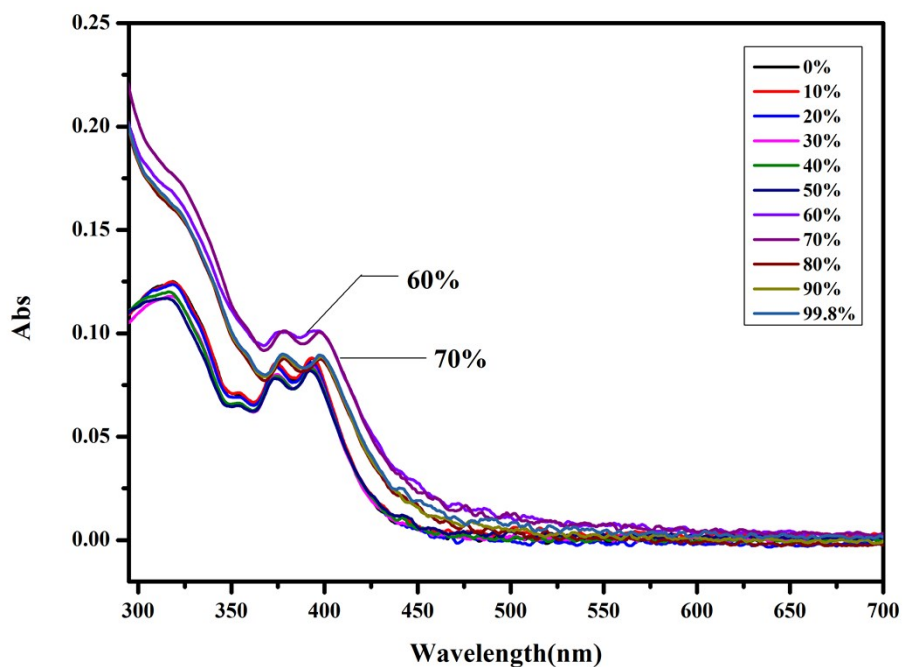

**Fig.S11.** UV-vis absorption spectra of **2** in different ratios of DMSO/H<sub>2</sub>O.

Concentration: 10  $\mu$ M.

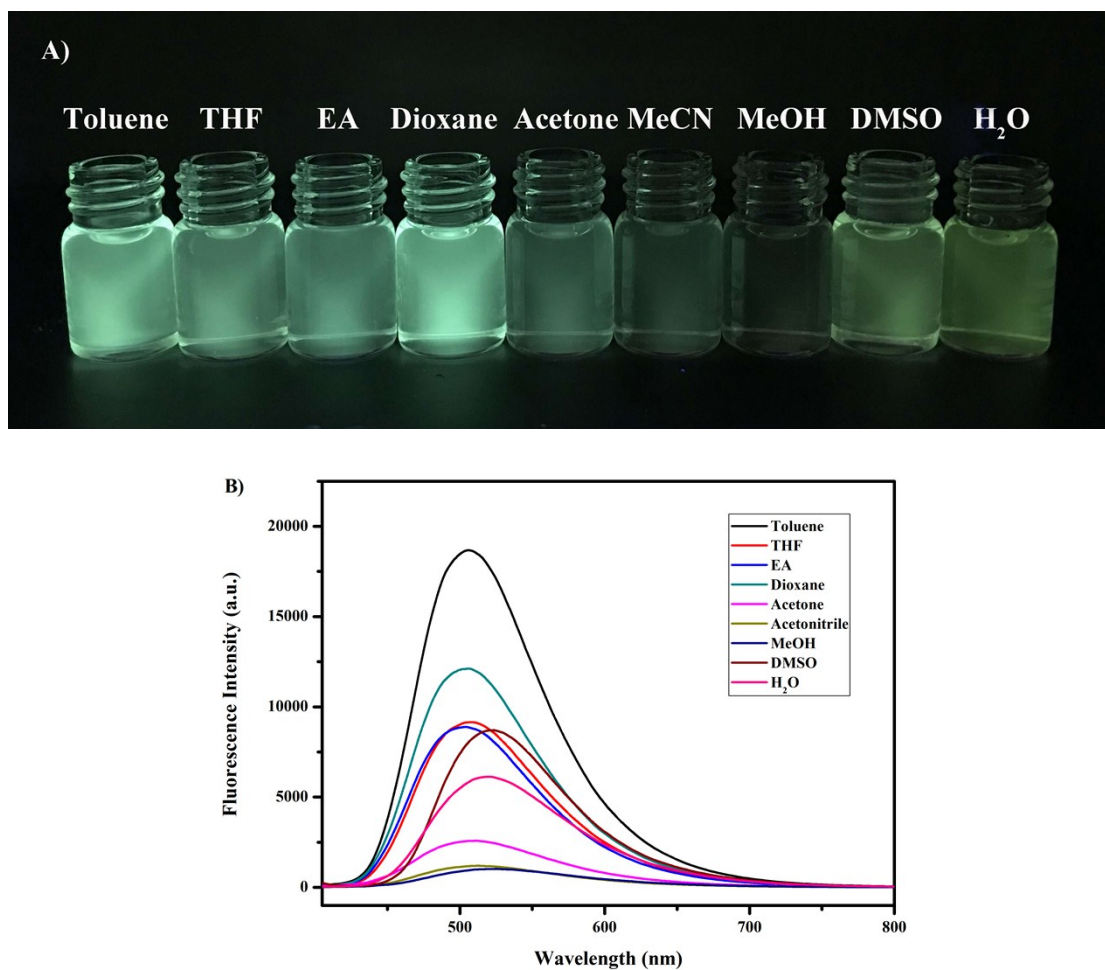

**Fig.S12.** (A) Fluorescence photography of probe **2** in different polar solvents under a UV lamp (365 nm). (B) Fluorescence spectra of probe **2** in different solutions.

Concentration: 10  $\mu$ M. Excitation wavelength: 394 nm.

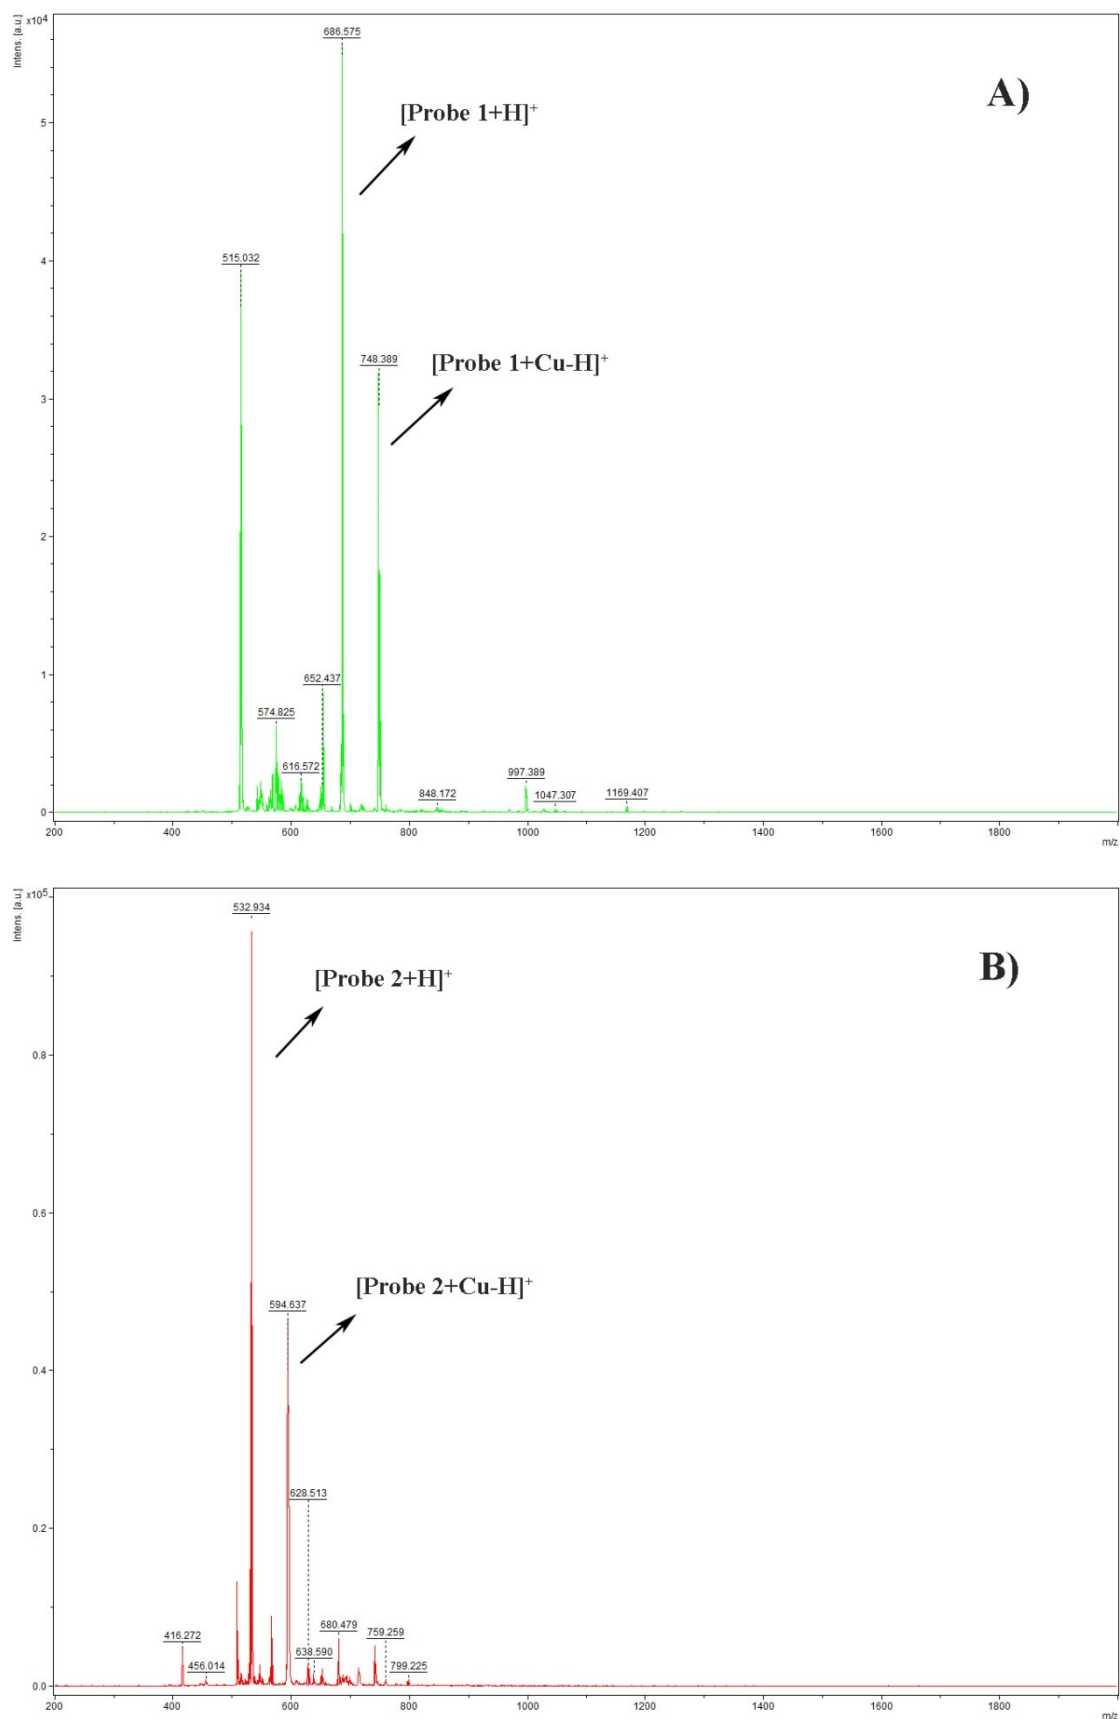

**Fig.S13.** (A) The MS spectrum of probe **1** with  $\text{Cu}^{2+}$  in  $\text{CH}_3\text{OH}$ . (B) The MS spectrum of probe **2** with  $\text{Cu}^{2+}$  in  $\text{CH}_3\text{OH}$ .

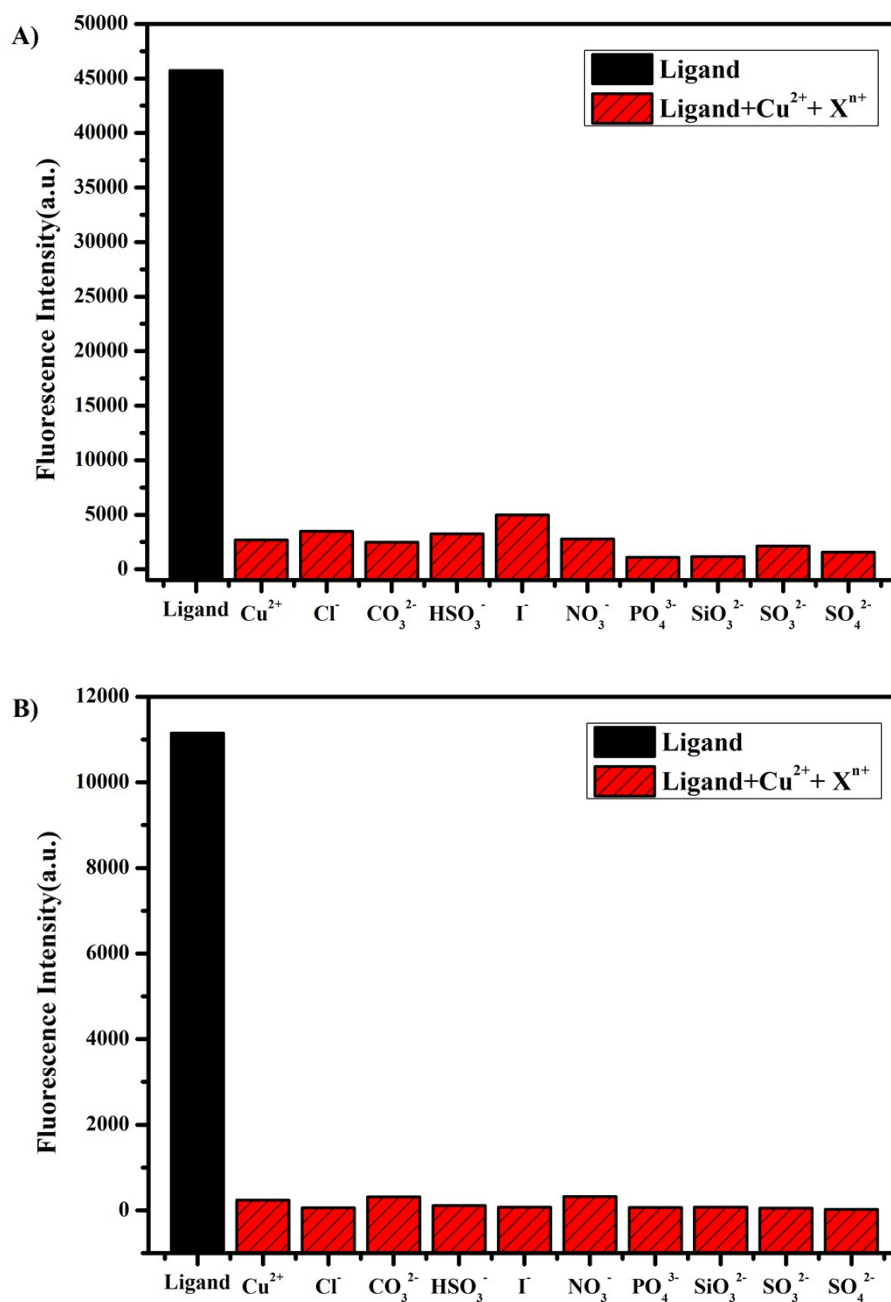

**Fig.S14.** (A) Fluorescence intensity of probe *1* in the presence of 30  $\mu\text{M}$   $\text{Cu}^{2+}$  together with 100  $\mu\text{M}$  various coexisting anions. (B) Fluorescence intensity of probe *2* in the presence of 15  $\mu\text{M}$   $\text{Cu}^{2+}$  together with 100  $\mu\text{M}$  various coexisting anions. Concentration of probe: 10  $\mu\text{M}$ .

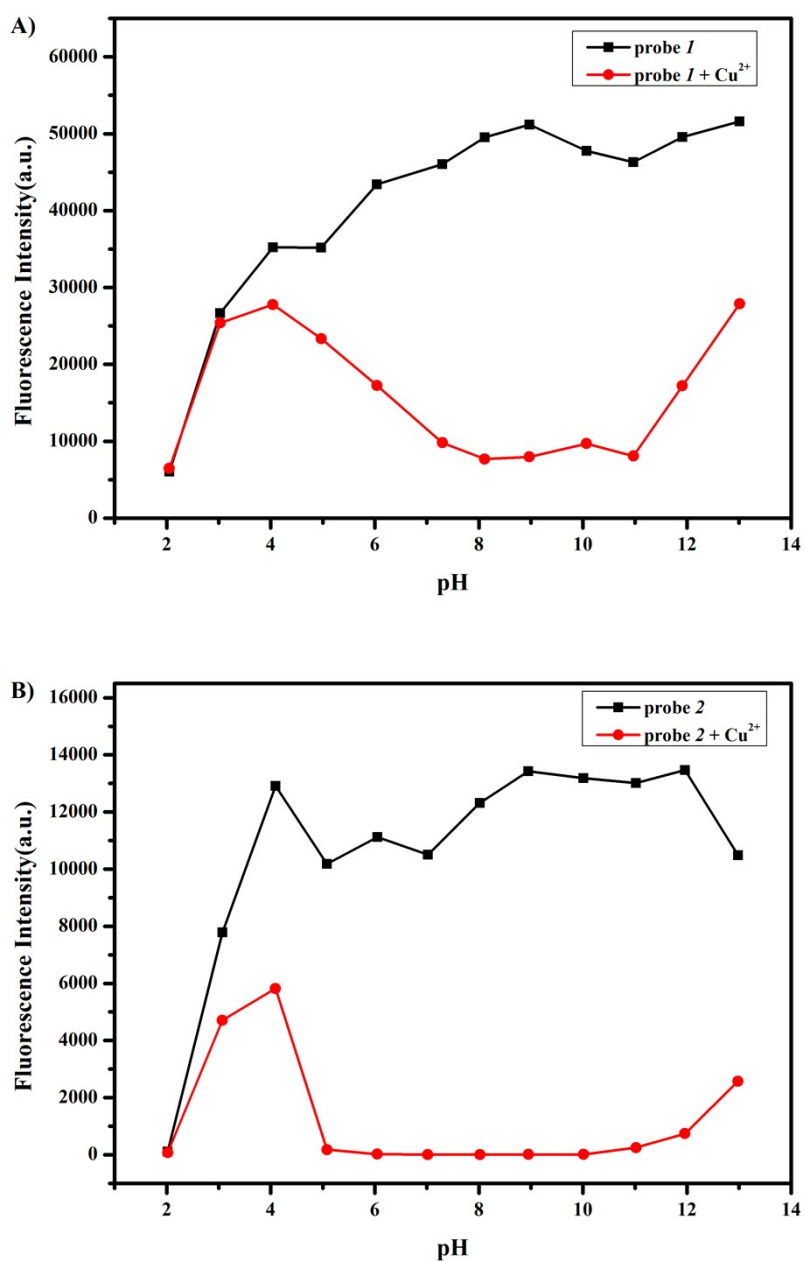

**Fig.S15.** (A) Fluorescence intensity of probe 1 (10  $\mu$ M) recorded in absence and presence of 30  $\mu$ M  $\text{Cu}^{2+}$  at different pHs in DMSO:  $\text{H}_2\text{O}$  (1:1, v/v),  $\lambda_{\text{ex}}$ : 370 nm,  $\lambda_{\text{em}}$ : 504 nm; (B) Fluorescence intensity of probe 2 (10  $\mu$ M) recorded in absence and presence of 15  $\mu$ M  $\text{Cu}^{2+}$  at different pHs in DMSO:  $\text{H}_2\text{O}$  (3:7, v/v),  $\lambda_{\text{ex}}$ : 394 nm,  $\lambda_{\text{em}}$ : 520 nm.

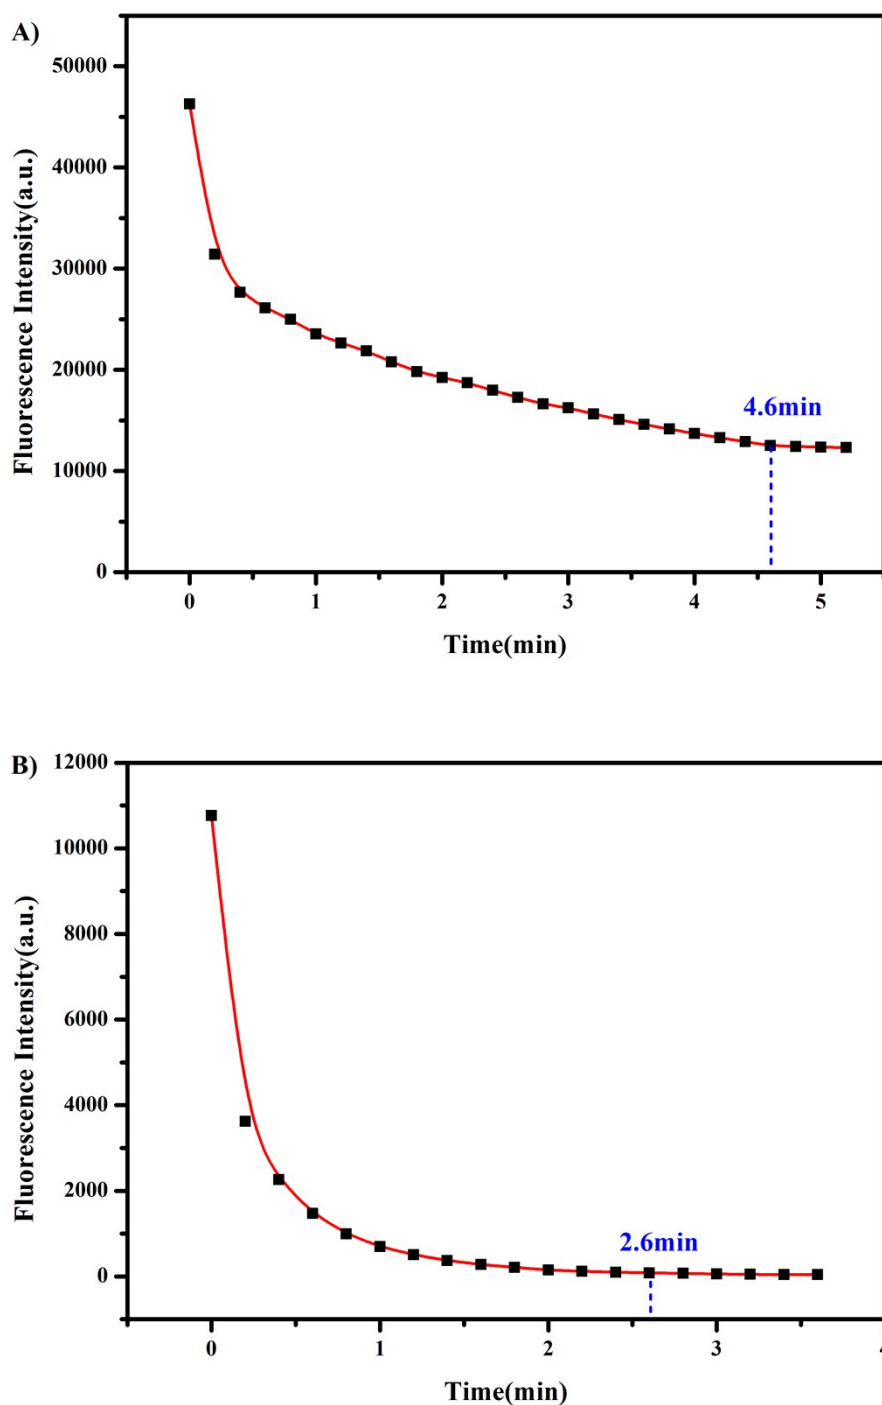

**Fig.S16.** (A) Time response of probe **1** (10 μM) to 3.0 equiv. of Cu<sup>2+</sup> in DMSO-H<sub>2</sub>O (1:1, v/v) solution; (B) Time response of probe **2** (10 μM) to 1.5 equiv. of Cu<sup>2+</sup> in DMSO-H<sub>2</sub>O (3:7, v/v) solution.

**Table Selected bond lengths (Å), bond angles (°) and torsion angles (°) for probe 1**

**Table S1** Bond Lengths for probe *I*.

| Atom | Atom | Length/Å | Atom | Atom | Length/Å |
|------|------|----------|------|------|----------|
| O1   | C34  | 1.366(2) | C18  | C19  | 1.377(3) |
| O1   | C38  | 1.412(2) | C19  | C20  | 1.387(3) |
| O2   | C39  | 1.220(2) | C21  | C22  | 1.392(3) |
| N1   | C29  | 1.327(2) | C21  | C26  | 1.392(2) |
| N1   | C33  | 1.363(2) | C22  | C23  | 1.385(2) |
| N2   | C39  | 1.343(2) | C23  | C24  | 1.394(2) |
| N2   | C40  | 1.409(3) | C24  | C25  | 1.399(3) |
| N3   | C47  | 1.310(2) | C24  | C27  | 1.469(2) |
| N3   | C48  | 1.366(2) | C25  | C26  | 1.381(2) |
| C1   | C2   | 1.390(3) | C27  | C28  | 1.329(2) |
| C1   | C6   | 1.392(3) | C28  | C29  | 1.467(2) |
| C1   | C7   | 1.492(2) | C29  | C30  | 1.419(3) |
| C2   | C3   | 1.383(2) | C30  | C32  | 1.355(3) |
| C3   | C4   | 1.377(3) | C31  | C32  | 1.410(3) |
| C4   | C5   | 1.380(3) | C31  | C33  | 1.419(3) |
| C5   | C6   | 1.386(3) | C31  | C37  | 1.417(2) |
| C7   | C8   | 1.359(2) | C33  | C34  | 1.426(2) |
| C7   | C15  | 1.487(3) | C34  | C35  | 1.370(2) |
| C8   | C9   | 1.493(2) | C35  | C36  | 1.407(3) |
| C8   | C21  | 1.495(2) | C36  | C37  | 1.358(3) |
| C9   | C10  | 1.396(3) | C38  | C39  | 1.513(3) |
| C9   | C14  | 1.393(3) | C40  | C41  | 1.374(3) |
| C10  | C11  | 1.383(3) | C40  | C48  | 1.424(3) |
| C11  | C12  | 1.387(3) | C41  | C42  | 1.408(3) |
| C12  | C13  | 1.379(3) | C42  | C43  | 1.356(3) |
| C13  | C14  | 1.386(3) | C43  | C44  | 1.414(3) |
| C15  | C16  | 1.387(2) | C44  | C45  | 1.404(3) |
| C15  | C20  | 1.393(3) | C44  | C48  | 1.415(3) |
| C16  | C17  | 1.382(3) | C45  | C46  | 1.361(3) |
| C17  | C18  | 1.379(3) | C46  | C47  | 1.414(3) |

**Table S2** Bond Angles for probe *I*.

| Atom | Atom | Atom | Angle/°    | Atom | Atom | Atom | Angle/°    |
|------|------|------|------------|------|------|------|------------|
| C34  | O1   | C38  | 118.37(14) | C25  | C24  | C27  | 122.64(16) |
| C29  | N1   | C33  | 117.99(16) | C26  | C25  | C24  | 121.40(16) |
| C39  | N2   | C40  | 127.53(16) | C25  | C26  | C21  | 120.72(18) |
| C47  | N3   | C48  | 117.41(17) | C28  | C27  | C24  | 126.36(18) |
| C2   | C1   | C6   | 118.48(16) | C27  | C28  | C29  | 126.55(18) |

---

|     |     |     |            |     |     |     |            |
|-----|-----|-----|------------|-----|-----|-----|------------|
| C2  | C1  | C7  | 121.20(17) | N1  | C29 | C28 | 115.03(16) |
| C6  | C1  | C7  | 120.24(16) | N1  | C29 | C30 | 122.24(16) |
| C3  | C2  | C1  | 120.54(19) | C30 | C29 | C28 | 122.72(16) |
| C4  | C3  | C2  | 120.43(19) | C32 | C30 | C29 | 119.69(17) |
| C3  | C4  | C5  | 119.83(18) | C32 | C31 | C33 | 116.35(16) |
| C4  | C5  | C6  | 119.9(2)   | C32 | C31 | C37 | 124.30(19) |
| C5  | C6  | C1  | 120.75(19) | C37 | C31 | C33 | 119.35(17) |
| C8  | C7  | C1  | 122.71(17) | C30 | C32 | C31 | 120.25(18) |
| C8  | C7  | C15 | 122.64(15) | N1  | C33 | C31 | 123.44(16) |
| C15 | C7  | C1  | 114.64(14) | N1  | C33 | C34 | 117.76(17) |
| C7  | C8  | C9  | 123.15(15) | C31 | C33 | C34 | 118.80(16) |
| C7  | C8  | C21 | 120.71(16) | O1  | C34 | C33 | 114.31(15) |
| C9  | C8  | C21 | 116.12(14) | O1  | C34 | C35 | 125.38(17) |
| C10 | C9  | C8  | 121.26(16) | C35 | C34 | C33 | 120.31(18) |
| C14 | C9  | C8  | 120.79(16) | C34 | C35 | C36 | 120.01(18) |
| C14 | C9  | C10 | 117.87(17) | C37 | C36 | C35 | 121.41(17) |
| C11 | C10 | C9  | 121.25(17) | C36 | C37 | C31 | 120.11(19) |
| C10 | C11 | C12 | 120.04(17) | O1  | C38 | C39 | 109.84(14) |
| C13 | C12 | C11 | 119.43(18) | O2  | C39 | N2  | 126.0(2)   |
| C12 | C13 | C14 | 120.53(17) | O2  | C39 | C38 | 118.25(17) |
| C13 | C14 | C9  | 120.88(17) | N2  | C39 | C38 | 115.73(16) |
| C16 | C15 | C7  | 121.02(16) | N2  | C40 | C48 | 116.13(16) |
| C16 | C15 | C20 | 117.80(18) | C41 | C40 | N2  | 123.91(18) |
| C20 | C15 | C7  | 121.06(17) | C41 | C40 | C48 | 119.93(18) |
| C17 | C16 | C15 | 121.4(2)   | C40 | C41 | C42 | 119.96(19) |
| C18 | C17 | C16 | 120.2(2)   | C43 | C42 | C41 | 121.44(19) |
| C19 | C18 | C17 | 119.3(2)   | C42 | C43 | C44 | 120.1(2)   |
| C18 | C19 | C20 | 120.5(2)   | C43 | C44 | C48 | 119.30(19) |
| C19 | C20 | C15 | 120.8(2)   | C45 | C44 | C43 | 123.40(19) |
| C22 | C21 | C8  | 120.08(15) | C45 | C44 | C48 | 117.29(19) |
| C22 | C21 | C26 | 118.12(16) | C46 | C45 | C44 | 119.97(19) |
| C26 | C21 | C8  | 121.73(16) | C45 | C46 | C47 | 118.33(19) |
| C23 | C22 | C21 | 121.23(16) | N3  | C47 | C46 | 124.22(19) |
| C22 | C23 | C24 | 120.85(17) | N3  | C48 | C40 | 118.05(17) |
| C23 | C24 | C25 | 117.66(16) | N3  | C48 | C44 | 122.72(17) |
| C23 | C24 | C27 | 119.69(17) | C44 | C48 | C40 | 119.21(18) |

---



**Table S3** Torsion Angles for probe *I*.

| A  | B   | C   | D   | Angle/°     | A   | B   | C   | D   | Angle/°     |
|----|-----|-----|-----|-------------|-----|-----|-----|-----|-------------|
| O1 | C34 | C35 | C36 | 179.70(17)  | C22 | C21 | C26 | C25 | 1.5(3)      |
| O1 | C38 | C39 | O2  | -176.50(17) | C22 | C23 | C24 | C25 | -0.7(3)     |
| O1 | C38 | C39 | N2  | 4.7(2)      | C22 | C23 | C24 | C27 | 177.93(17)  |
| N1 | C29 | C30 | C32 | 0.1(3)      | C23 | C24 | C25 | C26 | 1.1(3)      |
| N1 | C33 | C34 | O1  | 1.1(2)      | C23 | C24 | C27 | C28 | -164.37(19) |
| N1 | C33 | C34 | C35 | -179.19(16) | C24 | C25 | C26 | C21 | -1.6(3)     |
| N2 | C40 | C41 | C42 | -177.03(18) | C24 | C27 | C28 | C29 | 179.18(17)  |
| N2 | C40 | C48 | N3  | 0.1(2)      | C25 | C24 | C27 | C28 | 14.2(3)     |
| N2 | C40 | C48 | C44 | 178.91(17)  | C26 | C21 | C22 | C23 | -1.2(3)     |
| C1 | C2  | C3  | C4  | -1.6(3)     | C27 | C24 | C25 | C26 | -177.52(17) |
| C1 | C7  | C8  | C9  | -16.2(3)    | C27 | C28 | C29 | N1  | -162.72(18) |
| C1 | C7  | C8  | C21 | 162.36(16)  | C27 | C28 | C29 | C30 | 17.3(3)     |
| C1 | C7  | C15 | C16 | 132.92(17)  | C28 | C29 | C30 | C32 | -179.87(19) |
| C1 | C7  | C15 | C20 | -43.0(2)    | C29 | N1  | C33 | C31 | 2.5(3)      |
| C2 | C1  | C6  | C5  | -1.1(3)     | C29 | N1  | C33 | C34 | -177.63(16) |
| C2 | C1  | C7  | C8  | 134.02(19)  | C29 | C30 | C32 | C31 | 1.0(3)      |
| C2 | C1  | C7  | C15 | -45.7(2)    | C31 | C33 | C34 | O1  | -179.06(15) |
| C2 | C3  | C4  | C5  | 0.3(3)      | C31 | C33 | C34 | C35 | 0.7(3)      |
| C3 | C4  | C5  | C6  | 0.5(3)      | C32 | C31 | C33 | N1  | -1.4(3)     |
| C4 | C5  | C6  | C1  | -0.1(3)     | C32 | C31 | C33 | C34 | 178.69(16)  |
| C6 | C1  | C2  | C3  | 2.0(3)      | C32 | C31 | C37 | C36 | -179.21(18) |
| C6 | C1  | C7  | C8  | -49.4(3)    | C33 | N1  | C29 | C28 | 178.20(15)  |
| C6 | C1  | C7  | C15 | 130.89(18)  | C33 | N1  | C29 | C30 | -1.8(3)     |
| C7 | C1  | C2  | C3  | 178.62(18)  | C33 | C31 | C32 | C30 | -0.3(3)     |
| C7 | C1  | C6  | C5  | -177.81(18) | C33 | C31 | C37 | C36 | 0.2(3)      |
| C7 | C8  | C9  | C10 | -39.1(3)    | C33 | C34 | C35 | C36 | 0.0(3)      |
| C7 | C8  | C9  | C14 | 144.29(18)  | C34 | O1  | C38 | C39 | -169.15(16) |
| C7 | C8  | C21 | C22 | -50.5(2)    | C34 | C35 | C36 | C37 | -0.6(3)     |
| C7 | C8  | C21 | C26 | 132.66(19)  | C35 | C36 | C37 | C31 | 0.4(3)      |
| C7 | C15 | C16 | C17 | -176.28(17) | C37 | C31 | C32 | C30 | 179.13(19)  |
| C7 | C15 | C20 | C19 | 178.09(17)  | C37 | C31 | C33 | N1  | 179.08(17)  |
| C8 | C7  | C15 | C16 | -46.8(3)    | C37 | C31 | C33 | C34 | -0.8(3)     |
| C8 | C7  | C15 | C20 | 137.28(18)  | C38 | O1  | C34 | C33 | 174.47(15)  |
| C8 | C9  | C10 | C11 | -177.94(16) | C38 | O1  | C34 | C35 | -5.3(3)     |
| C8 | C9  | C14 | C13 | 177.14(16)  | C39 | N2  | C40 | C41 | 7.9(3)      |
| C8 | C21 | C22 | C23 | -178.13(16) | C39 | N2  | C40 | C48 | -170.10(18) |
| C8 | C21 | C26 | C25 | 178.44(17)  | C40 | N2  | C39 | O2  | -6.7(3)     |
| C9 | C8  | C21 | C22 | 128.17(18)  | C40 | N2  | C39 | C38 | 172.04(17)  |

|                 |            |                 |             |
|-----------------|------------|-----------------|-------------|
| C9 C8 C21 C26   | -48.7(2)   | C40 C41 C42 C43 | -1.7(3)     |
| C9 C10 C11 C12  | 1.2(3)     | C41 C40 C48 N3  | -178.02(17) |
| C10 C9 C14 C13  | 0.4(3)     | C41 C40 C48 C44 | 0.8(3)      |
| C10 C11 C12 C13 | -0.4(3)    | C41 C42 C43 C44 | 0.7(3)      |
| C11 C12 C13 C14 | -0.4(3)    | C42 C43 C44 C45 | 179.9(2)    |
| C12 C13 C14 C9  | 0.4(3)     | C42 C43 C44 C48 | 1.0(3)      |
| C14 C9 C10 C11  | -1.2(3)    | C43 C44 C45 C46 | -177.2(2)   |
| C15 C7 C8 C9    | 163.53(17) | C43 C44 C48 N3  | 176.97(18)  |
| C15 C7 C8 C21   | -17.9(3)   | C43 C44 C48 C40 | -1.8(3)     |
| C15 C16 C17 C18 | -1.8(3)    | C44 C45 C46 C47 | 0.1(3)      |
| C16 C15 C20 C19 | 2.1(3)     | C45 C44 C48 N3  | -2.0(3)     |
| C16 C17 C18 C19 | 2.0(3)     | C45 C44 C48 C40 | 179.29(18)  |
| C17 C18 C19 C20 | -0.2(3)    | C45 C46 C47 N3  | -2.1(3)     |
| C18 C19 C20 C15 | -1.8(3)    | C47 N3 C48 C40  | 178.93(17)  |
| C20 C15 C16 C17 | -0.3(3)    | C47 N3 C48 C44  | 0.2(3)      |
| C21 C8 C9 C10   | 142.32(17) | C48 N3 C47 C46  | 1.9(3)      |
| C21 C8 C9 C14   | -34.3(2)   | C48 C40 C41 C42 | 0.9(3)      |
| C21 C22 C23 C24 | 0.8(3)     | C48 C44 C45 C46 | 1.7(3)      |

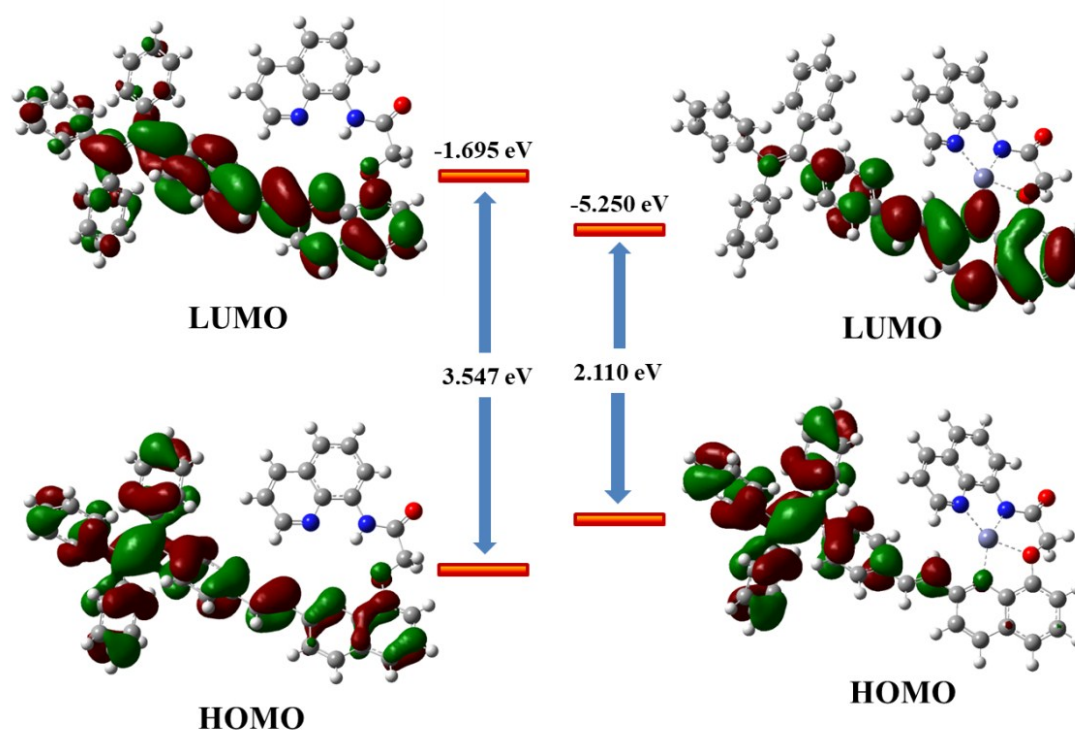

**Fig. S17.** The frontier molecular orbital distributions and orbital energy levels of free *I* and  $\text{Zn}^{2+}$  adduct complex of *I*.

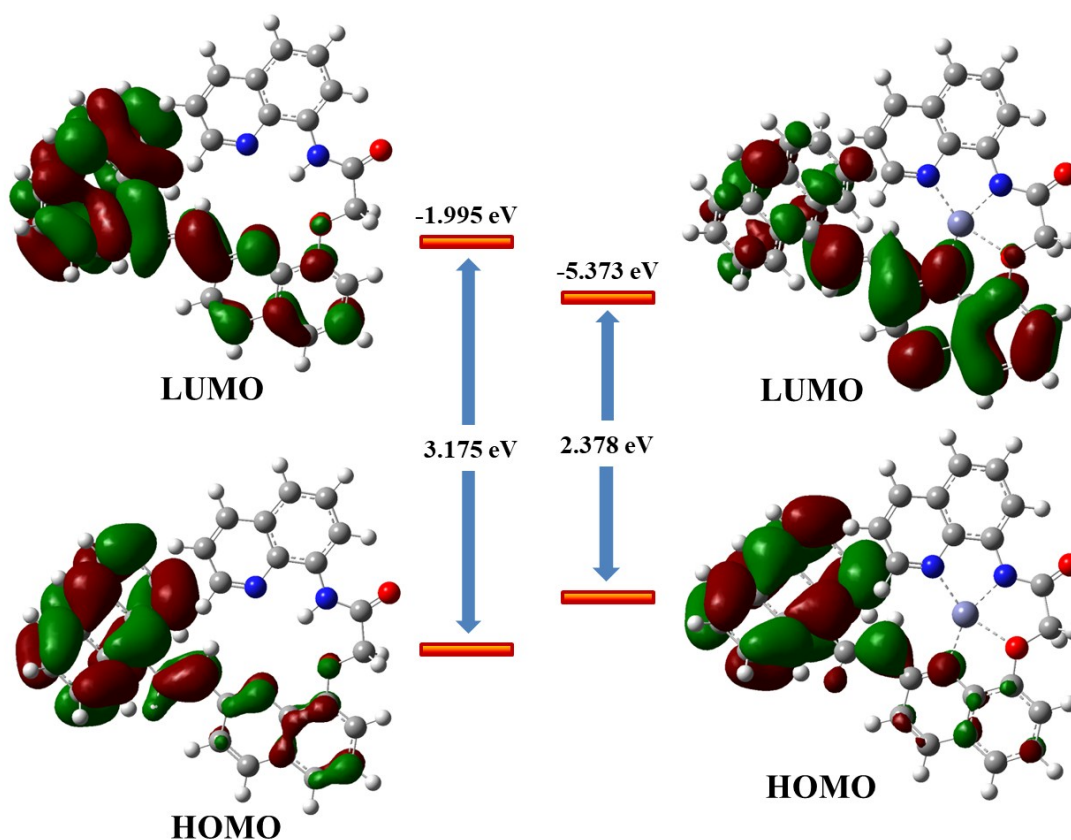

**Fig. S18.** The frontier molecular orbital distributions and orbital energy levels of free **2** and  $\text{Zn}^{2+}$  adduct complex of **2**.

**Table S4.** Selected electronic transition and absorption energies along with their oscillator strengths ( $f$ ),  $\lambda_{\text{abs}}$  of theoretical calculation and experiment of **1**- $\text{Zn}^{2+}$  and **2**- $\text{Zn}^{2+}$ .

| Sensors and complexes       | Electronic transition | $\lambda_{\text{abs}}$ (nm) (theoretical Values) | $\lambda_{\text{abs}}$ (nm) (experimental Values) | $\Delta E_{\text{ST}}$ (eV) | $f$    | Excited state |
|-----------------------------|-----------------------|--------------------------------------------------|---------------------------------------------------|-----------------------------|--------|---------------|
| Probe <b>1</b>              | $S_0 \rightarrow S_1$ | 392                                              | 370                                               | 3.547                       | 0.8285 | H to L        |
| <b>1</b> + $\text{Zn}^{2+}$ | $S_0 \rightarrow S_1$ | 668                                              | 370                                               | 2.110                       | 0.4177 | H to L        |
| Probe <b>2</b>              | $S_0 \rightarrow S_1$ | 436                                              | 394                                               | 3.175                       | 0.3473 | H to L        |
| <b>2</b> + $\text{Zn}^{2+}$ | $S_0 \rightarrow S_1$ | 598                                              | 394                                               | 2.070                       | 0.3016 | H to L        |
